# Supplementary material for: Room temperature spontaneous valley polarization in two-dimensional FeClBr monolayer
Source: Royal Society of Chemistry journal article supplement (doi:10.1039/d1nr04063d), 2021-01-01
Supplement: d1nr04063d1.pdf [file d1nr04063d1.pdf]

Supporting Information

**Room Temperature Spontaneous Valley Polarization in Two-dimensional FeClBr Monolayer**

Rui Li, Jiawei Jiang, Wenbo Mi\*, Haili Bai\*

*Tianjin Key Laboratory of Low Dimensional Materials Physics and Preparation  
Technology, School of Science, Tianjin University, Tianjin 300354, China*

---

\*Author to whom all correspondence should be addressed.

E-mail: [miwenbo@tju.edu.cn](mailto:miwenbo@tju.edu.cn)

E-mail: [baihaili@tju.edu.cn](mailto:baihaili@tju.edu.cn)

The Hamiltonian for the spin of Fe atom, which including the DMI, can be expressed as

$$H = -\sum_{\langle i,j \rangle} D_{ij} \cdot (\mathbf{S}_i \times \mathbf{S}_j) - J \sum_{\langle i,j \rangle} \mathbf{S}_i \cdot \mathbf{S}_j - K \sum_i (S_i^z)^2 \quad (\text{S1})$$

where  $\mathbf{S}_i$  is the three-dimensional unit vector representing the orientation of the spin of  $i$ th Fe atom,  $\langle i,j \rangle$  is the nearest-neighbor Fe atom pairs. The three magnetic interaction terms are DMI, Heisenberg isotropic exchange and easy axis single ion anisotropy, respectively. The result is shown in Fig. S1. It can be seen that the orientation of magnetization is parallel to the  $z$ -axis direction, which is consistent with the magnetocrystalline anisotropy.

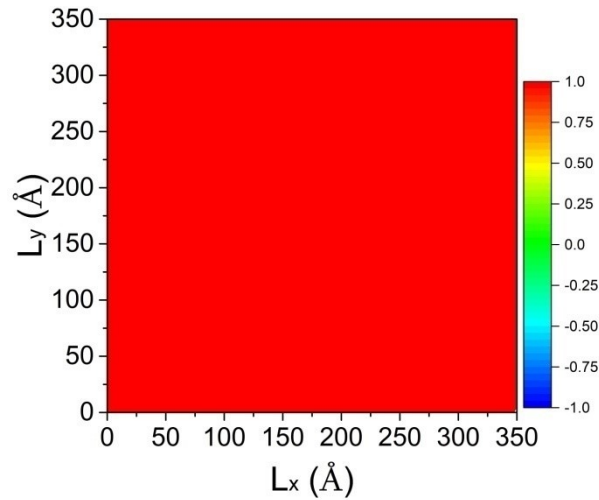

**Fig. S1** Magnetic states for FeClBr monolayer in real-space.

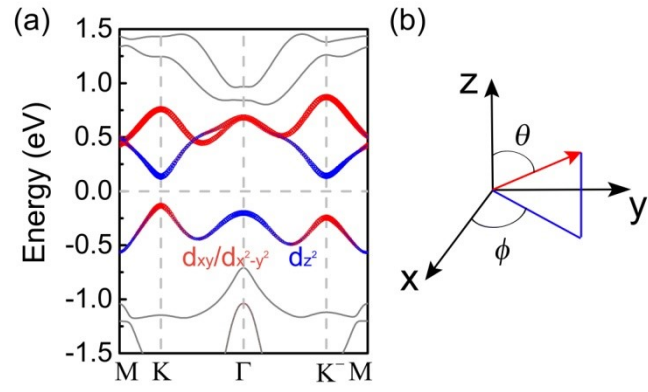

**Fig. S2**(a) The orbital projected band of FeClBr monolayer, the red and blue represent the contribution of  $d_{x^2-y^2}/d_{xy}$  and  $d_{z^2}$ . (b) Schematic of polar angles of spin orientation.

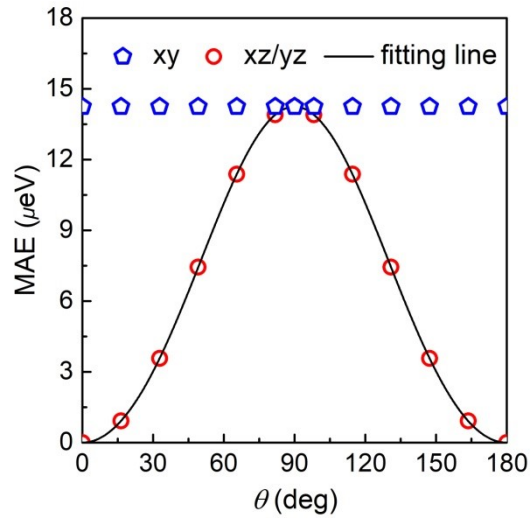

**Fig. S3** Angular dependence MAE of FeClBr monolayer with the direction of magnetization lying on three different planes: *xy*, *xz* and *yz*.
